CORRECTION

# Correction: Optogenetics in Mice Performing a Visual Discrimination Task: Measurement and Suppression of Retinal Activation and the Resulting Behavioral Artifact

**Bethanny Danskin, Daniel Denman, Matthew Valley, Douglas Ollerenshaw, Derric Williams, Peter Groblewski, Clay Reid, Shawn Olsen, Timothy Blanche, Jack Waters**

Dr. Timothy Blanche is not included in the author byline. He should be listed as the ninth author and affiliated with the Allen Institute for Brain Science, 551 N 34th St, Seattle, WA, 98103, United States of America. The contributions of this author are as follows: Contributed reagents/materials/analysis tools, conceived and designed the experiments.

## Reference

1. Danskin B, Denman D, Valley M, Ollerenshaw D, Williams D, Groblewski P, et al. (2015) Optogenetics in Mice Performing a Visual Discrimination Task: Measurement and Suppression of Retinal Activation and the Resulting Behavioral Artifact. PLoS ONE 10(12): e0144760. doi:[10.1371/journal.pone.0144760](https://doi.org/10.1371/journal.pone.0144760) PMID: [26657323](https://pubmed.ncbi.nlm.nih.gov/26657323/)

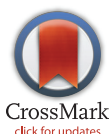

## OPEN ACCESS

**Citation:** Danskin B, Denman D, Valley M, Ollerenshaw D, Williams D, Groblewski P, et al. (2016) Correction: Optogenetics in Mice Performing a Visual Discrimination Task: Measurement and Suppression of Retinal Activation and the Resulting Behavioral Artifact. PLoS ONE 11(2): e0148883. doi:[10.1371/journal.pone.0148883](https://doi.org/10.1371/journal.pone.0148883)

**Published:** February 5, 2016

**Copyright:** © 2016 Danskin et al. This is an open access article distributed under the terms of the [Creative Commons Attribution License](https://creativecommons.org/licenses/by/4.0/), which permits unrestricted use, distribution, and reproduction in any medium, provided the original author and source are credited.
